# Supplementary material for: Consciousness Detection in a Complete Locked-in Syndrome Patient through Multiscale Approach Analysis
Source: MDPI journal article supplement (doi:10.3390/e22121411), 2020-12-15
Supplement: s1 [file s1]

Date: 2008-03-16

Arrive: 14.50  
Heart rate: 98  
Oxygen saturation: 97  
Lying on side: back/left  
Respiration BPM: 15  
Ground: S032  
Reference: G102

Initial eye movement looked much stronger than previous days. I asked him questions (without video):

You feel good today? +

You feel bad today? -

0. Are you happy that I'm here? +

0. Would you prefer to be alone and to watch TV? -

The responses were so strong that I thought a conversation was possible. I turned on the video.

The following questions were asked. Someone should check the video to check me.

1. You feel good today? +

1. You feel bad today? -

2. Are you German? +

2. Are you Dutch? -

3. Do you feel pain? -

3. Are you free of pain? +

4. Are you satisfied by the health care at BS (city in Germany)? +

4. Are you unsatisfied by the health care at BS? -

4. Are you unsatisfied by the health care at BS? -

4. Are you satisfied by the health care at BS? +

5. Are you still happy to have decided for the operation? +

5. Are you sorry for having decided to do the operation? -

6. Do you think, you have feedback control over sound? +

6. Do you think the feedback is not controllable? -

7. Are the sounds loud enough for you? +

7. Should we turn the speaker louder? -

7. Should we turn down the speaker?

7. Are the speakers o.k.? +

"We would like to know about your psychological status. We want to know how your mood is."

8. Are you positive regarding the future? +

8. Do you not know exactly what future will bring for you, so, are you neutral for your future? -

8. Are you negative for the future? -

"I will ask you now a question that has to be asked to you some when."

9. Do you wish sometimes, you were dead? -

9. You never wished to be dead? +##

10. Can you enjoy your life under these circumstances? +

10. You don't enjoy your life any more? -

11. Was it a good decision to bring you to BS? +

11. Do you prefer to go back to Vohenstrauss (his home town)? +&-(not clear)

11. Do you prefer to go back to Vohenstrauss? -

12. Do you want to stay at BS in the future? -

12. Do you want to stay at BS in the future? -

12. Do you prefer to go into another nursing home? +

12. Do you prefer to go into another nursing home? +

13. You want to go back to Vohenstrauss in some later period? Do I understand you correctly? + (no clear answer)

13. You want in another nursing home than Vohenstrauss? + (no clear answer)

"I have been informed, that our political contacts we have engaged to convince the health insurance regarding your care costs will publish a report about you in the SPEIGEL (very renown German journal). Unfortunately, I don't know more than that, neither about the content of the article. I will inform myself to tell you."

14. Shouldn't we go to public with the health insurance? -

14. Shouldn't we fight we the health insurance? -

14. Should we fight with the health insurance? -

15. For long term schedule: You want to go to Vohenstrauss? +

15. For long term schedule: You want to stay at BS? +

"It's not clear to me what you want to say, GR."

16. You don't care where you will be in future? -

"I ask you a different way now."

17. For long term schedule, are you Prefer Vohenstrauss before BS?  
-

"I see a NO in your eyes, is this correct?"  
+ (including corner of the mouth)

(I tried letting him repeat the mouth twitch but it didn't always work. Instructed hi to use whatever he could or both).

17. Do you prefer, for long term, to stay at BS before Vohenstrauss? -

17. You want another nursing home than those 2?

You want to spell something?

George then spelled the word "AMBERG"

This was a long process where I repeatedly double checked (verified "correct?" and "wrong?") if I got all letters correct. I also asked him for confirmation or declination of the final word "AMBERG". Someone should CHECK the video and check me.

I, then suspected that he wanted to go to Amberg instead of staying in BS or going back to Vehenstrauss.

18. You mean, you want to go to Amberg in the future? +

Did I understood you wrong, that you want to go to Amberg in the future? -

VIDEO lost power. We take a break and I type up this conversation.

Time: 17.00

Heart rate: 94

Oxygen saturation: 98  
Lying on side: back/left  
Respiration BPM: 15
